# Supplementary material
Source: Springer Nature journal article supplement (https://www.springermedizin.de/resource/supplementary/12885_2012_3897_MOESM5_ESM.pdf/9464550)

A

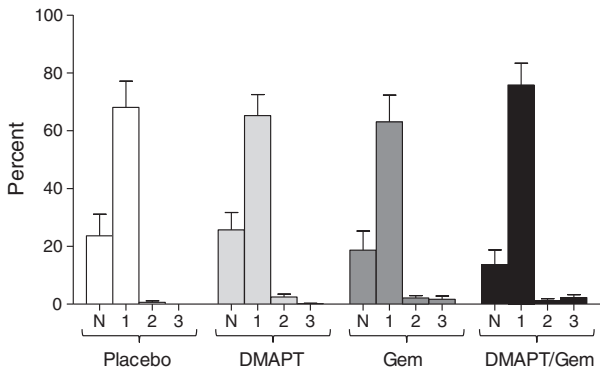

B

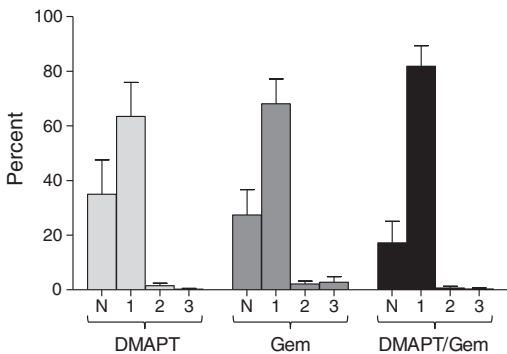

|                            | DMAPT     | Gemcitabine | DMAPT/Gem |
|----------------------------|-----------|-------------|-----------|
| <b>mPanIN-2, incidence</b> | 2/4 = 50% | 3/8 = 38%   | 1/6 = 17% |
| <b>mPanIN-3, incidence</b> | 1/4 = 25% | 3/8 = 38%   | 1/6 = 17% |

Supplement: MOESM5 [file 9464550]
